# Supplementary material for: Microwave-induced low temperature pyrolysis of macroalgae for unprecedented hydrogen-enriched syngas production
Source: Royal Society of Chemistry journal article supplement (doi:10.1039/c4ra05372a), 2014-01-01
Supplement: c4ra05372a1.pdf [file c4ra05372a1.pdf]

Supporting information

**Microwave-induced low temperature pyrolysis of macroalgae for unprecedented hydrogen-enriched syngas production**

Jose M. Bermúdez<sup>a</sup>, Matteo Francavilla<sup>b,c</sup>, Esther G. Calvo<sup>a</sup>, Ana Arenillas<sup>a</sup>, Massimo Franchi<sup>c</sup>, J. Angel Menéndez<sup>a\*</sup>, Rafael Luque<sup>d\*</sup>

MIP accelerates the production of gases, but considerable differences in gas production in comparison with CP, make necessary to prolong the pyrolysis more time in the MW heating than in the case of the conventional heating.

**Table 1S.** Times (min) at which the gas production falls to 5 or 10 % of the maximum production.

|                        | Time (min) |        |          |          |        |       |        |
|------------------------|------------|--------|----------|----------|--------|-------|--------|
|                        | 400CP      | 400MIP | 400MIP-G | 400MIP-C | 600MIP | 800CP | 800MIP |
| 5% of max. production  | 47         | 67     | 172      | 80       | 68     | 36    | 67     |
| 10% of max. production | 39         | 52     | 140      | 69       | 62     | 29    | 52     |

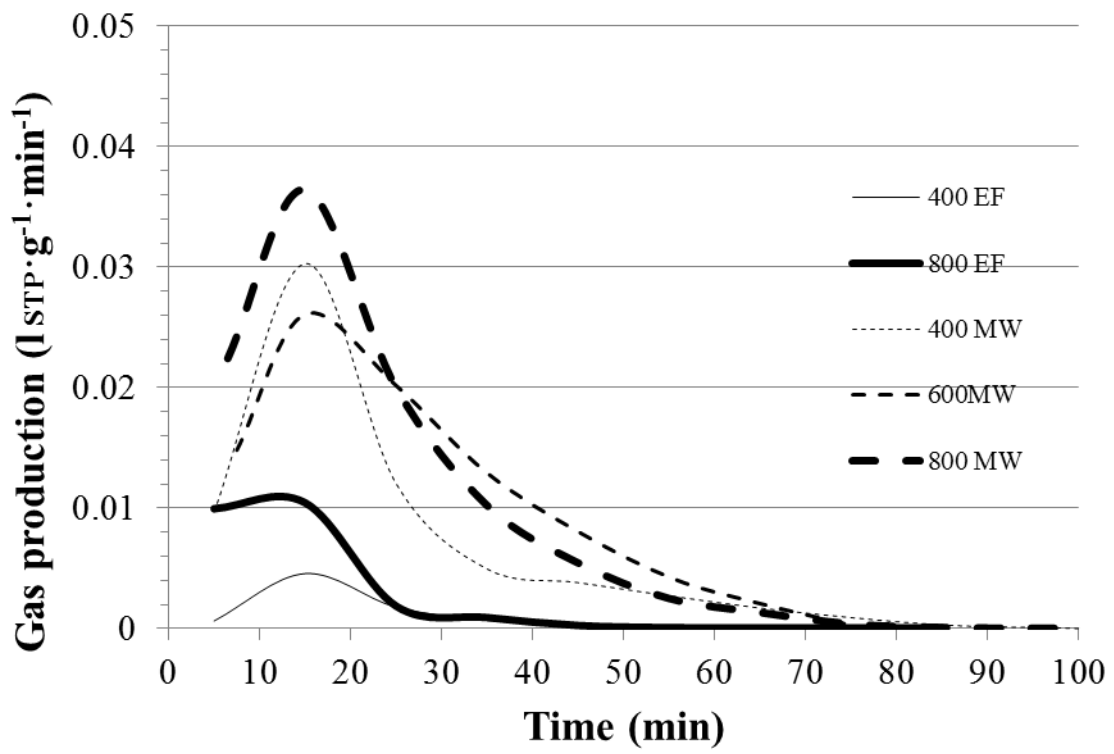

Fig. 1S. Production in each instant of the experiments of pyrolysis

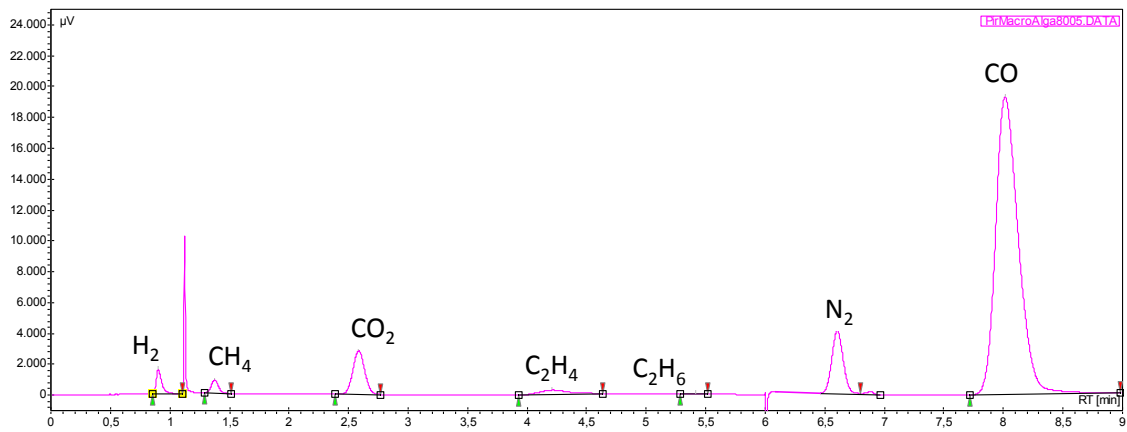

Figure 2S. Gas chromatogram obtained of one of the bags collected during the experiments.

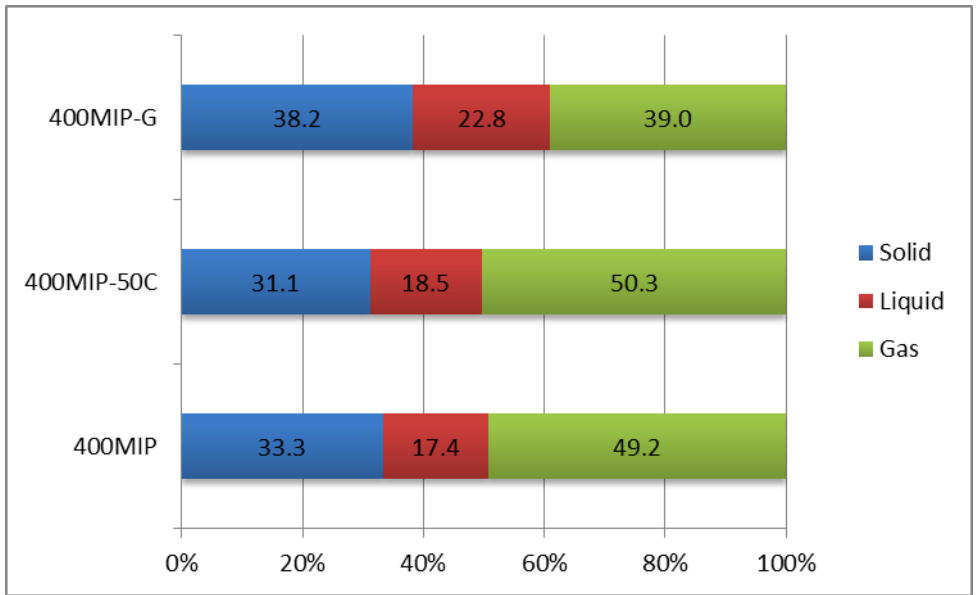

Figure 3S. Yields of the different fractions obtained in the MIP of algae at 400 °C with different captors.

Table 2S. Detailed elemental analysis of the biochar generated after CP at 800°C

| <b>Element</b>  | <b>Sample in ppm</b> |
|-----------------|----------------------|
| <b>Li (ppm)</b> | 50                   |
| <b>B (ppm)</b>  | 210                  |
| <b>Na (%)</b>   | 2                    |
| <b>Mg (%)</b>   | 0.5                  |
| <b>Al (ppm)</b> | 3032                 |
| <b>Si (%)</b>   | 1.49                 |
| <b>P (%)</b>    | 1                    |
| <b>S (%)</b>    | 3                    |
| <b>K (%)</b>    | 12                   |
| <b>Ti (ppm)</b> | 106                  |
| <b>Mn (ppm)</b> | 1546                 |
| <b>Cu (ppm)</b> | 20                   |
| <b>Zn (ppm)</b> | 38                   |
| <b>Rb (ppm)</b> | 85                   |
| <b>Sr (ppm)</b> | 168                  |
| <b>Ba (ppm)</b> | 26                   |
| <b>Fe (ppm)</b> | 2093                 |

Table 3S. Porous texture characterization of the solid fraction.

|                                                  | 400CP | 400MIP | 800CP | 800MIP |
|--------------------------------------------------|-------|--------|-------|--------|
| $S_{\text{BET}}$ ( $\text{m}_2/\text{g}$ )       | -     | 38     | 13    | 109    |
| $V_{\text{P}}$ ( $\text{cm}_3/\text{g}$ )        | -     | 0.03   | 0.02  | 0.10   |
| $V_{\text{mic-N}_2}$ ( $\text{cm}^3/\text{g}$ )  | -     | 0.01   | 0.006 | 0.04   |
| $V_{\text{mic-CO}_2}$ ( $\text{cm}^3/\text{g}$ ) | -     | 0.11   | -     | 0.06   |
| $\rho_{\text{HE}}$                               | 1.51  | 1.85   | 1.57  | 1.92   |
